# Supplementary material for: Vine Shoots as a Source of Trans-Resveratrol and ε-Viniferin: A Study of 23 Italian Varieties
Source: MDPI journal article supplement (doi:10.3390/foods11040553), 2022-02-15
Supplement: s1 [file s1]

# Vine-shoots as a source of *trans*-resveratrol and $\epsilon$ -viniferin: a study about 23 Italian cultivar

Mirella Noviello, Antonio Francesco Caputi, Giacomo Squeo, Vito Michele Paradiso, Giuseppe Gambacorta and Francesco Caponio\*

\*Correspondence: Department of Soil, Plant and Food Science (DISSPA), University of Bari Aldo Moro, via Amendola, 165/a, I-70126 Bari, Italy; Francesco Caponio [francesco.caponio@uniba.it](mailto:francesco.caponio@uniba.it);

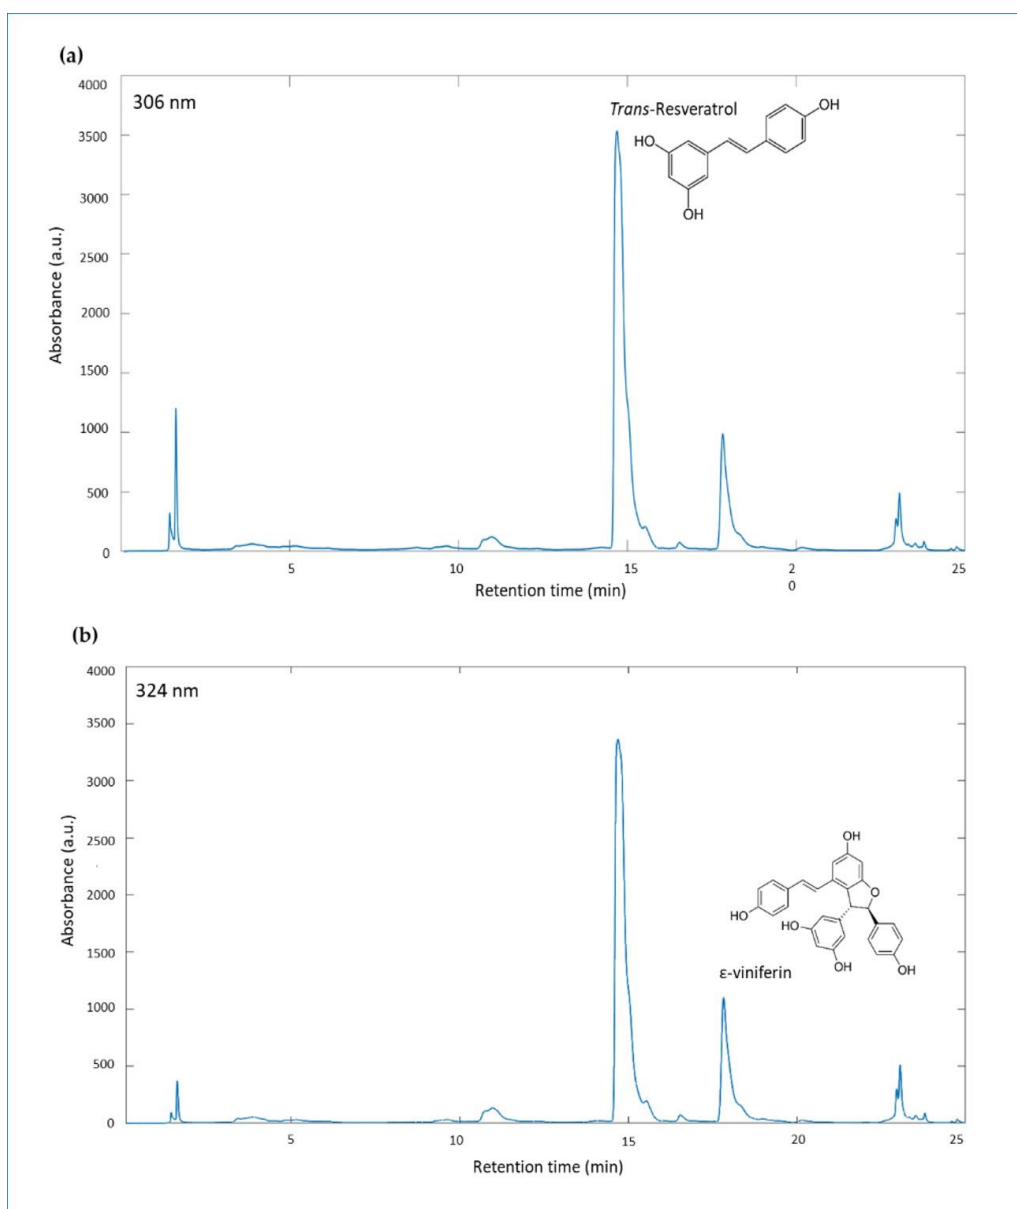

**Figure S1.** Stilbenes HPLC-DAD chromatogram of cultivar Palieri vine-shoots extract detected at 306 nm (a) and 324 nm (b).

**Table S1.** Stilbene concentrations (mg kg<sup>-1</sup> DW) in vine-shoots from 23 different Italian varieties. Means and standard deviation (*n*=2) are represented in the same column and data followed by different letters indicate statistically significant differences according to Fisher's LSD test (*P* < 0.05). For sample codes see table 1 of the main text.

| Stilbene concentrations (mg kg <sup>-1</sup> DW) |                               |                               |                               |
|--------------------------------------------------|-------------------------------|-------------------------------|-------------------------------|
| Sample                                           | <i>trans</i> -resveratrol     | ε-viniferin                   | Total stilbenes               |
| AG                                               | 2299.1 ± 44.6 <sup>j</sup>    | 1352.4 ± 39.6 <sup>def</sup>  | 3651.5 ± 5.0 <sup>jkl</sup>   |
| BA                                               | 2954.0 ± 173.8 <sup>ghi</sup> | 290.8 ± 32.0 <sup>kl</sup>    | 3244.8 ± 205.8 <sup>m</sup>   |
| BB                                               | 3945.0 ± 57.6 <sup>ef</sup>   | 175.9 ± 19.6 <sup>l</sup>     | 4121.0 ± 38.0 <sup>hi</sup>   |
| BN                                               | 3120.4 ± 248.6 <sup>g</sup>   | 1342.7 ± 0.5 <sup>def</sup>   | 4463.1 ± 248.1 <sup>fgh</sup> |
| CI                                               | 2837.3 ± 94.4 <sup>hi</sup>   | 1035.9 ± 34.5 <sup>hi</sup>   | 3873.3 ± 128.9 <sup>ij</sup>  |
| FB                                               | 3823.2 ± 156.3 <sup>f</sup>   | 700.4 ± 7.0 <sup>i</sup>      | 4523.6 ± 149.3 <sup>efg</sup> |
| IT                                               | 4098.0 ± 90.5 <sup>de</sup>   | 2038.4 ± 15.8 <sup>a</sup>    | 6136.5 ± 74.6 <sup>ab</sup>   |
| MB                                               | 2378.9 ± 48.7 <sup>i</sup>    | 926.1 ± 6.0 <sup>i</sup>      | 3305.1 ± 42.6 <sup>klm</sup>  |
| MN                                               | 3103.7 ± 27.6 <sup>ghi</sup>  | 1240.9 ± 106.8 <sup>efg</sup> | 4344.6 ± 134.5 <sup>gh</sup>  |
| MA                                               | 3120.7 ± 12.9 <sup>g</sup>    | 1199.8 ± 112.9 <sup>fg</sup>  | 4320.6 ± 101.6 <sup>gh</sup>  |
| MI                                               | 4410.9 ± 51.4 <sup>bc</sup>   | 543.1 ± 48.0 <sup>j</sup>     | 4954.0 ± 99.3 <sup>d</sup>    |
| MO                                               | 4500.6 ± 0.1 <sup>b</sup>     | 1701.1 ± 119.7 <sup>b</sup>   | 6201.7 ± 119.9 <sup>ab</sup>  |
| NE                                               | 5249.4 ± 129.8 <sup>a</sup>   | 600.9 ± 79.0 <sup>j</sup>     | 5850.4 ± 50.8 <sup>bc</sup>   |
| NT                                               | 5298.1 ± 45.2 <sup>a</sup>    | 363.5 ± 26.8 <sup>k</sup>     | 5661.6 ± 18.4 <sup>c</sup>    |
| ND                                               | 4217.2 ± 101.5 <sup>cd</sup>  | 1493.6 ± 111.2 <sup>cd</sup>  | 5710.8 ± 212.8 <sup>c</sup>   |
| OT                                               | 2271.8 ± 17.6 <sup>j</sup>    | 1390.4 ± 94.2 <sup>cde</sup>  | 3662.2 ± 111.9 <sup>jk</sup>  |
| PA                                               | 4549.6 ± 153.8 <sup>b</sup>   | 1819.3 ± 164.3 <sup>b</sup>   | 6369.0 ± 318.1 <sup>a</sup>   |
| PR                                               | 1861.3 ± 9.8 <sup>k</sup>     | 1531.6 ± 89.1 <sup>c</sup>    | 3392.9 ± 98.9 <sup>lm</sup>   |
| SA                                               | 2742.6 ± 166.5 <sup>i</sup>   | 615.6 ± 12.4 <sup>j</sup>     | 3358.2 ± 154.0 <sup>klm</sup> |
| SU                                               | 3731.8 ± 11.6 <sup>f</sup>    | 1029.2 ± 85.0 <sup>hi</sup>   | 4761.0 ± 73.4 <sup>def</sup>  |
| TR                                               | 2240.2 ± 47.5 <sup>i</sup>    | 1029.3 ± 32.6 <sup>hi</sup>   | 3266.6 ± 80.0 <sup>m</sup>    |
| VE                                               | 2327.4 ± 179.7 <sup>i</sup>   | 375.4 ± 50.7 <sup>k</sup>     | 2702.9 ± 230.4 <sup>n</sup>   |
| VI                                               | 3726.2 ± 336.0 <sup>f</sup>   | 1126.0 ± 150.5 <sup>gh</sup>  | 4852.2 ± 486.6 <sup>de</sup>  |
